# Supplementary material
Source: ML conference proceedings conference paper supplement (https://proceedings.neurips.cc/paper_files/paper/2023/hash/61d0a96d4a73b626367310b3ad32579d-Abstract.html)
Supplement: Supplementary file 1 [file 61d0a96d4a73b626367310b3ad32579d-Supplemental-Conference.pdf]

## 390 A Supplementary Material: Proofs

### 391 A.1 Missing Proofs from Section 3

392 To establish Lemmas 3.1 and 3.3, we build on the work of (VWDP<sup>+</sup>22) and (DLPES02). We first  
393 introduce the necessary notion and definitions.

394 We recall the following notation from the main body of the paper. We use  $\text{diam}_\infty$  to indicate the  
395 diameter of a set relative to the  $\ell_\infty$  norm and  $\overline{B}_\varepsilon^\infty(\vec{p})$  to represent the closed ball of radius  $\varepsilon$  centered  
396 at  $\vec{p}$  relative to the  $\ell_\infty$  norm. That is, in  $\mathbb{R}^d$  we have  $\overline{B}_\varepsilon^\infty(\vec{p}) = \prod_{i=1}^d [p_i - \varepsilon, p_i + \varepsilon]$ .

397 Lemma 3.1 is based on the construction of certain geometric partitions of  $\mathbb{R}^d$  called *secluded*  
398 *partitions*. Such partitions naturally induce deterministic rounding schemes which we use in the  
399 proof.

400 Let  $\mathcal{P}$  be a partition of  $\mathbb{R}^d$ . For a point  $\vec{p} \in \mathbb{R}^d$ , let  $N_\varepsilon(\vec{p})$  denote the set of members of the partitions  
401 that have a non-empty intersection with the  $\varepsilon$ -ball around  $\vec{p}$ . That is,

$$N_\varepsilon(\vec{p}) = \{X \in \mathbb{P} \mid \overline{B}_\varepsilon^\infty(\vec{p}) \cap X \neq \emptyset\}$$

402 **Definition A.1** (Secluded Partition). Let  $\mathcal{P}$  be a partition of  $\mathbb{R}^d$ . We say that  $\mathcal{P}$  is  $(k, \varepsilon)$ -secluded, if  
403 for every point  $\vec{p} \in \mathbb{R}^d$ ,  $|N_\varepsilon(\vec{p})| \leq k$ .

404 The following theorem from (VWDP<sup>+</sup>22) gives an explicit construction of a secluded partition with  
405 desired parameters where each member of the partition is a hypercube. For such partitions, we use  
406 the following notation. For every  $\vec{p} \in \mathbb{R}^d$ , if  $X \in \mathbb{P}$ , then the *representative of  $\vec{p}$* ,  $\text{rep}(\vec{p})$ , is the center  
407 of the hypercube  $X$ .

408 **Theorem A.2.** For each  $d \in \mathbb{N}$ , there exists a  $(d + 1, \frac{1}{2d})$ -secluded partition, where each member of  
409 the partition is a unit hypercube. Moreover, the partition is efficiently computable: Given an arbitrary  
410 point  $\vec{x} \in \mathbb{R}^d$ , its representative can be computed in time polynomial in  $d$ .

#### 411 A.1.1 Proof of Lemma 3.1

412 **Lemma A.3** (Lemma 3.1). Let  $d \in \mathbb{N}$  and  $\varepsilon \in (0, \infty)$ . Let  $\varepsilon_0 = \frac{\varepsilon}{2d}$ . There is an efficiently  
413 computable function  $f_\varepsilon : \mathbb{R}^d \rightarrow \mathbb{R}^d$  with the following two properties:

- 414 1. For any  $x \in \mathbb{R}^d$  and any  $\hat{x} \in \overline{B}_{\varepsilon_0}^\infty(x)$  it holds that  $f_\varepsilon(\hat{x}) \in \overline{B}_\varepsilon^\infty(x)$ .
- 415 2. For any  $x \in \mathbb{R}^d$  the set  $\{f_\varepsilon(\hat{x}) : \hat{x} \in \overline{B}_{\varepsilon_0}^\infty(x)\}$  has cardinality at most  $d + 1$ .

416 As explained in the main body, intuitively, item (1) states that if  $\hat{x}$  is an  $\varepsilon_0$ -approximation of  $x$ , then  
417  $f_\varepsilon(\hat{x})$  is an  $\varepsilon$ -approximation of  $x$ , and item (2) states that  $f_\varepsilon$  maps every  $\varepsilon_0$ -approximation of  $x$  to  
418 one of at most  $d + 1$  possible values.

419 *Proof.* A high-level idea behind the proof is explained in Figure 1. We scale the  $(d + 1, \frac{1}{2d})$ -secluded  
420 unit hypercube partition by  $\varepsilon$  so that each partition member is a hypercube with side length  $\varepsilon$ . Now,  
421 for a point  $x$ , the ball  $\overline{B}_{\varepsilon_0}^\infty(x)$  intersects at most  $d + 1$  hypercubes. Consider a point  $\hat{x}_1 \in \overline{B}_{\varepsilon_0}^\infty(x)$ , it  
422 is rounded to  $c_1$  (center of the hypercube it resides in). Note that  $c_1$  lies in the ball of radius  $\varepsilon$  around  
423  $x$ , this is because distance from  $x$  to  $\hat{x}_1$  is at most  $\varepsilon_0$  and the distance from  $\hat{x}_1$  to  $c_1$  is at most  $\varepsilon/2$ . By  
424 triangle inequality  $c_1$  belongs to  $\overline{B}_\varepsilon^\infty(x)$ . We now provide formal proof.

425 Let  $\mathcal{P}$  be the  $(d + 1, \frac{1}{2d})$ -secluded partition given by Theorem A.2. Thus  $\mathcal{P}$  consists of unit cubes  
426  $[0, 1]^d$  with the property that for any point  $\vec{p} \in \mathbb{R}^d$  the closed cube of side length  $1/d$  centered at  $\vec{p}$   
427 (i.e.  $\overline{B}_{\frac{1}{2d}}^\infty(\vec{p})$ ) intersects at most  $d + 1$  members/cubes of  $\mathcal{P}$ .

428 We first define a *rounding* function  $f : \mathbb{R}^d \rightarrow \mathbb{R}^d$  as follows: for every  $x \in \mathbb{R}^d$ ,  $f(x) = \text{rep}(x)$ .

429 Observe that the rounding function  $f$  has the following two properties. (1) For every  $x \in \mathbb{R}^d$ ,  
430  $\|f(x) - x\|_\infty \leq \frac{1}{2}$ . This is because every point  $x$  is mapped via  $f$  to its representative, which is the  
431 center of the unit cube in which it lies. (2) For any point  $\vec{p} \in \mathbb{R}^d$ , the set  $\{f(x) : x \in \overline{B}_{\frac{1}{2d}}^\infty(\vec{p})\}$  has

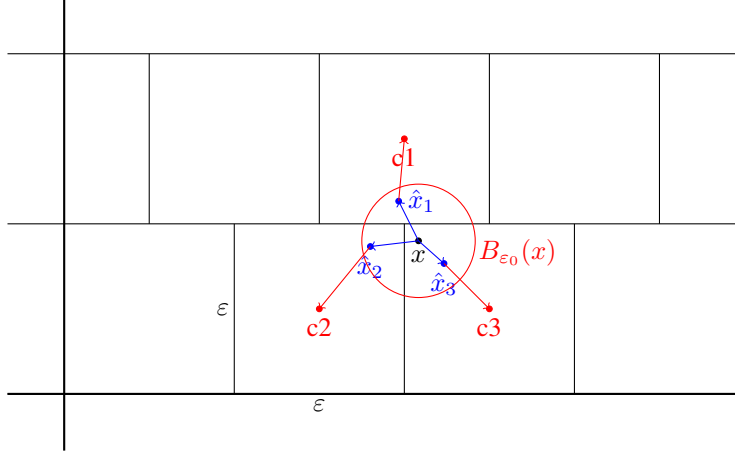

Figure 1: Illustration of proof of Lemma [3.1](#) for  $d = 2$ .

432 cardinality at most  $d + 1$ . This is because  $\overline{B}_{\frac{1}{2d}}^\infty(\vec{p})$  intersects at most  $d + 1$  hypercubes of  $\mathcal{P}$  and for  
 433 every hypercube  $X$ , all the points in  $X$  are mapped to its center by  $f$ .

434 The function  $f$  only gives an  $\frac{1}{2}$ -approximation guarantee. In order to get any  $\varepsilon$ -approximation  
 435 guarantee, we scale  $f$  appropriately.  $f_\varepsilon$  is this *scaled* version of  $f$ .

436 Define the function  $f_\varepsilon : \mathbb{R}^d \rightarrow \mathbb{R}^d$  as follows: for every  $\hat{x} \in \mathbb{R}^d$ ,  $f_\varepsilon(\hat{x}) = \varepsilon \cdot f(\frac{1}{\varepsilon}\hat{x})$ . The efficient  
 437 computability of  $f_\varepsilon$  comes from the efficient computability of  $f$ .

438 We first establish that  $f_\varepsilon$  has property (1) stated in the Lemma. Let  $x \in \mathbb{R}^d$  and  $\hat{x} \in \overline{B}_{\varepsilon_0}^\infty(x)$ . Then  
 439 we have the following (justifications will follow):

$$\begin{aligned} \left\| \frac{1}{\varepsilon} \cdot f_\varepsilon(\hat{x}) - \frac{1}{\varepsilon}x \right\|_\infty &= \left\| f\left(\frac{1}{\varepsilon}\hat{x}\right) - \frac{1}{\varepsilon}x \right\|_\infty \\ &\leq \left\| f\left(\frac{1}{\varepsilon}\hat{x}\right) - \frac{1}{\varepsilon}\hat{x} \right\|_\infty + \left\| \frac{1}{\varepsilon}\hat{x} - \frac{1}{\varepsilon}x \right\|_\infty \\ &\leq \left\| f\left(\frac{1}{\varepsilon}\hat{x}\right) - \frac{1}{\varepsilon}\hat{x} \right\|_\infty + \frac{1}{\varepsilon} \|\hat{x} - x\|_\infty \\ &\leq \frac{1}{2} + \frac{1}{\varepsilon}\varepsilon_0 \\ &= \frac{1}{2} + \frac{1}{2d} \leq 1 \end{aligned}$$

440 The first line is by the definition of  $f_\varepsilon$ , the second is the triangle inequality, the third is scaling of  
 441 norms, the fourth uses the property of  $f$  that points are not mapped a distance more than  $\frac{1}{2}$  along  
 442 with the hypothesis that  $\hat{x} \in \overline{B}_{\varepsilon_0}^\infty(x)$ , the fifth uses the definition of  $\varepsilon_0$ , and the sixth uses the fact that  
 443  $d \geq 1$ .

444 Scaling both sides by  $\varepsilon$  and using the scaling of norms, the above gives us  $\|f_\varepsilon(\hat{x}) - x\|_\infty \leq \varepsilon$  which  
 445 proves property (1) of the lemma.

446 To see that  $f_\varepsilon$  has property (2), let  $x \in \mathbb{R}^d$ . We have the following set equalities:

$$\begin{aligned} \left\{ f_\varepsilon(\hat{x}) : \hat{x} \in \overline{B}_{\varepsilon_0}^\infty(x) \right\} &= \left\{ \varepsilon \cdot f\left(\frac{1}{\varepsilon}\hat{x}\right) : \hat{x} \in \overline{B}_{\varepsilon_0}^\infty(x) \right\} \\ &= \left\{ \varepsilon \cdot f(a) : a \in \overline{B}_{\frac{1}{\varepsilon}\varepsilon_0}^\infty(x) \right\} \\ &= \left\{ \varepsilon \cdot f(a) : a \in \overline{B}_{\frac{1}{2d}}^\infty(x) \right\} \end{aligned}$$

447 The first line is from the definition of  $f_\varepsilon$ , the second is from re-scaling, and the third is from the  
 448 definition of  $\varepsilon_0$ .

449 Because  $f$  takes on at most  $d + 1$  distinct values on  $\overline{B}_{\frac{1}{2d}}^\infty(x)$ , the set has cardinality at most  $d + 1$   
 450 which proves property (2) of the lemma.  $\square$

451 **A.1.2 Proof of Lemma 3.2**

452 **Lemma A.4** (Lemma 3.2). *Let  $d \in \mathbb{N}$ ,  $\varepsilon_0 \in (0, \infty)$  and  $0 < \delta < 1$ . There is an efficiently computable*  
 453 *deterministic function  $f : \{0, 1\}^\ell \times \mathbb{R}^d \rightarrow \mathbb{R}^d$  with the following property. For any  $x \in \mathbb{R}^d$ ,*

$$\Pr_{r \in \{0,1\}^\ell} \left[ \exists x^* \in \overline{B}_\varepsilon^\infty(x) \ \forall \hat{x} \in \overline{B}_{\varepsilon_0}^\infty(x) : f(r, \hat{x}) = x^* \right] \geq 1 - \delta$$

454 *where  $\ell = \lceil \log \frac{d}{\delta} \rceil$  and  $\varepsilon = (2^\ell + 1)\varepsilon_0 \leq \frac{2\varepsilon_0 d}{\delta}$ .*

455 *Proof.* Partition each coordinate of  $\mathbb{R}^d$  into  $2\varepsilon_0$ -width intervals. The algorithm computing the  
 456 function  $f$  does the following simple randomized rounding:

457 *The function  $f$  :* Choose a random integer  $r \in \{1 \dots 2^\ell\}$ . Note that  $r$  can be represented using  $\ell$  bits.  
 458 Consider the  $i^{\text{th}}$  coordinate of  $\hat{x}$  denoted by  $\hat{x}[i]$ . Round  $\hat{x}[i]$  to the nearest  $k * (2\varepsilon_0)$  such that  $k$   
 459  $\text{mod } 2^\ell \equiv r$ .

460 Now we will prove that  $f$  satisfies the required properties.

461 First, we prove the approximation guarantee. Let  $x'$  denote the point in  $\mathbb{R}^d$  obtained after rounding  
 462 each coordinate of  $\hat{x}$ . The  $k$ s satisfying  $k \text{ mod } 2^\ell \equiv r$  are  $2^\ell \cdot 2\varepsilon_0$  apart. Therefore,  $x'[i]$  is rounded  
 463 by at most  $2^\ell \varepsilon_0$ . That is,  $|x'[i] - \hat{x}[i]| \leq 2^\ell \varepsilon_0 = \frac{\varepsilon_0 d}{\delta}$  for every  $i$ ,  $1 \leq i \leq d$ . Since  $\hat{x}$  is an  
 464  $\varepsilon_0$ -approximation (i.e. each coordinate  $\hat{x}[i]$  is within  $\varepsilon_0$  of the true value  $x[i]$ ), then each coordinate of  
 465  $x'$  is within  $(2^\ell + 1)\varepsilon_0$  of  $x[i]$ . Therefore  $x'$  is a  $(2^\ell + 1)\varepsilon_0$ -approximation of  $x[i]$ . Thus  $x' \in \overline{B}_\varepsilon^\infty(x)$   
 466 for any choice of  $r$ .

467 Now we establish that for  $\geq 1 - \delta$  fraction of  $r \in \{1 \dots 2^\ell\}$ , there exists  $x^*$  such every  $\hat{x} \in \overline{B}_{\varepsilon_0}^\infty(x)$   
 468 is rounded  $x^*$ . We argue this with respect to each coordinate and apply the union bound. Fix an  $x$   
 469 and a coordinate  $i$ . For  $x[i]$ , consider the  $\varepsilon_0$  interval around it.

470 Consider  $r$  from  $\{1 \dots 2^\ell\}$ . When this  $r$  is chosen, then we round  $\hat{x}[i]$  to the closest  $k * (2\varepsilon_0)$  such that  
 471  $k \text{ mod } 2^\ell \equiv r$ . Let  $p_1^r, p_2^r, \dots, p_j^r \dots$  be the set of such points: more precisely  $p_j = (j2^\ell + r) * 2\varepsilon_0$ .  
 472 Note that  $\hat{x}[i]$  is rounded to an  $p_j$  to some  $j$ . Let  $m_j^r$  denote the midpoint between  $p_j^r$  and  $p_{j+1}^r$ .  
 473 I.e.,  $m_j^r = (p_j^r + p_{j+1}^r)/2$ . We call  $r$  ‘bad’ for  $x[i]$  if  $x[i]$  is close to some  $m_j^r$ . That is,  $r$  is ‘bad’ if  
 474  $|x[i] - m_j^r| < \varepsilon_0$ . Note that for a bad  $r$  there exists  $\hat{x}_1$  and  $\hat{x}_2$  in  $\overline{B}_{\varepsilon_0}^\infty(x)$  so that their  $i^{\text{th}}$  coordinates  
 475 are round to  $p_j^r$  and  $p_{j+1}^r$  respectively. The crucial point is that if  $r$  is ‘not bad’ for  $x[i]$ , then for every  
 476  $x' \in \overline{B}_{\varepsilon_0}^\infty(x)$ , there exists a canonical  $p^*$  such that  $x'[i]$  is rounded to  $p^*$ . We call  $r$  bad for  $x$ , if  $r$  is  
 477 bad for  $x$ , if there exists at least one  $i$ ,  $1 \leq i \leq d$  such that  $r$  is bad for  $x[i]$ . With this, it follows that  
 478 if  $r$  is not bad for  $x$ , then there exists a canonical  $x^*$  such that every  $x' \in \overline{B}_{\varepsilon_0}^\infty(x)$  is rounded to  $x^*$ .

479 With this, the goal is to bound the probability that a randomly chosen  $r$  is bad for  $x$ . For this, we  
 480 first bound the probability that  $r$  is bad for  $x[i]$ . We will argue that there exists almost one bad  $r$   
 481 for  $x[i]$ . Suppose that there exist two numbers  $r_1$  and  $r_2$  that are both bad for  $x[i]$ . This means  
 482 that  $|x[i] - m_{j_1}^{r_1}| < \varepsilon_0$  and  $|x[i] - m_{j_2}^{r_2}| < \varepsilon_0$  for some  $j_1$  and  $j_2$ . Thus by triangle inequality  
 483  $|m_{j_1}^{r_1} - m_{j_2}^{r_2}| < 2\varepsilon_0$ . However, note that  $|p_{j_1}^{r_1} - p_{j_2}^{r_2}|$  is  $|(j_1 - j_2)2^\ell + (r_1 - r_2)|2\varepsilon_0$ . Since  $r_1 \neq r_2$ ,  
 484 this value is at least  $2\varepsilon_0$ . This implies that the absolute value of difference between  $m_{j_1}^{r_1}$  and  $m_{j_2}^{r_2}$  is  
 485 at least  $2\varepsilon$  leading to a contradiction.

486 Thus the probability that  $r$  is bad for  $x[i]$  is at most  $\frac{1}{2^\ell}$  and by the union bound the probability that  $r$   
 487 is bad for  $x$  is at most  $\frac{d}{2^\ell} \leq \delta$ . This completes the proof.  $\square$

488 **A.1.3 Proof of Lemma 3.3**

489 The proof, which is based on Sperner/KKM Lemma, is present in (VWDP<sup>+</sup>22). Since our setting is  
 490 slightly different, for completeness we give a proof.

491 We first introduce the necessary definitions and notation.

492 **Definition A.5** (Sperner/KKM Coloring). Let  $d \in \mathbb{N}$  and  $V = \{0, 1\}^d$  denote a set of colors (which  
 493 is exactly the set of vertices of  $[0, 1]^d$  so that colors and vertices are identified). Let  $\chi : [0, 1]^d \rightarrow V$   
 494 be a coloring function such that for any face  $F$  of  $[0, 1]^d$ , for any  $x \in F$ , it holds that  $\chi(x) \in V(F)$

495 where  $V(F)$  is the vertex set of  $F$  (informally, the color of  $x$  is one of the vertices in the face  $F$ ).  
 496 Such a function  $\chi$  will be called a Sperner/KKM coloring.

497 **Theorem A.6** (Cubical Sperner/KKM lemma (DLPE02)). *Let  $d \in \mathbb{N}$  and  $V = \{0, 1\}^d$  and  
 498  $\chi : [0, 1]^d \rightarrow V$  be a Sperner/KKM coloring. Then there exists a subset  $J \subset V$  with  $|J| = d + 1$  and  
 499 a point  $\vec{y} \in [0, 1]^d$  such that for all  $j \in J$ ,  $\vec{y} \in \overline{\chi^{-1}(j)}$  (informally,  $\vec{y}$  is in the closure of at least  $d + 1$   
 500 different colors).*

501 We will need to relate partitions to Sperner/KKM coloring so that we can use the Sperner/KKM  
 502 Lemma.

503 For any co-ordinate  $i$ , let  $\pi$  denote the standard projection map:  $\pi_i : [0, 1]^d \rightarrow [0, 1]$  defined by  
 504  $\pi_i(x) \stackrel{\text{def}}{=} x_i$  which maps  $d$ -dimensional points to the  $i^{\text{th}}$  coordinate value. We extend this to sets:  
 505  $\pi_i(X) = \{\pi_i(x) : x \in X\}$ .

506 **Definition A.7** (Non-Spanning partition). *Let  $d \in \mathbb{N}$  and  $\mathcal{P}$  be a partition of  $[0, 1]^d$ . We say that  
 507  $\mathcal{P}$  is a non-spanning partition if it holds for all  $X \in \mathcal{P}$  and for all  $i \in [d]$  that either  $\pi_i(X) \not\cong 0$  or  
 508  $\pi_i(X) \not\cong 1$  (or both).*

509 Next, we state a lemma that asserts that for any non-spanning partition, there is a Sperner/KKM  
 510 coloring that respects the partition: that is every member gets the same color.

511 **Lemma A.8** (Coloring Admission). *Let  $d \in \mathbb{N}$ , and  $V = \{0, 1\}^d$ , and  $\mathcal{P}$  a non-spanning partition of  
 512  $[0, 1]^d$ . Then there exists a Sperner/KKM coloring  $\chi : [0, 1]^d \rightarrow V$  such that for every  $X \in \mathcal{P}$ , for  
 513 every  $x, y \in X$ ,  $\chi(x) = \chi(y)$ .*

514 Now we are ready to prove the Lemma 3.3

515 **Lemma A.9.** (Lemma 3.3) *Let  $\mathcal{P}$  be a partition of  $[0, 1]^d$  such that for each member  $X \in \mathcal{P}$ , it  
 516 holds that  $\text{diam}_\infty(X) < 1$ . Then there exists  $\vec{p} \in [0, 1]^d$  such that for all  $\delta > 0$  we have that  $\overline{B}_\delta^\infty(\vec{p})$   
 517 intersects at least  $d + 1$  members of  $\mathcal{P}$ .*

518 *Proof.* Consider an arbitrary  $X \in \mathcal{P}$ . For each coordinate,  $i \in [d]$ , the set  $\{x_i : x \in X\}$  does not  
 519 contain both 0 and 1 (if it did, this would demonstrate two points in  $X$  that are  $\ell_\infty$  distance at least  
 520 1 apart and contradict that  $\text{diam}_\infty(X) < 1$ ). Thus,  $\mathcal{P}$  is by definition a non-spanning partition of  
 521  $[0, 1]^d$ . Since  $\mathcal{P}$  is non-spanning, by Lemma A.8, there is a Sperner/KKM coloring where each point  
 522 of  $[0, 1]^d$  can be assigned one of  $2^d$ -many colors and for any member  $X \in \mathcal{P}$ , all points in  $X$  are  
 523 assigned the same color. By Lemma A.6, there is a point  $\vec{p} \in [0, 1]^d$  such that  $\vec{p}$  belongs to the closure  
 524 of at least  $d + 1$  colors. Since every point of a partition has the same color, each of these  $d + 1$  colors  
 525 corresponds to at least  $d + 1$  different partitions. From this, it follows that for any  $\delta > 0$ ,  $\overline{B}_\delta^\infty(\vec{p})$   
 526 intersects at least  $d + 1$  different members of  $\mathcal{P}$ .  $\square$

## 527 A.2 Missing Proofs from Section 4

528 In the following we use  $\mathcal{D}_{A, \vec{b}, n}$  to denote the distribution of the output of an algorithm for  $d$ -COIN  
 529 BIAS ESTIMATION PROBLEM when the bias vector is  $\vec{b}$  and it observes  $n$  independent coin tosses  
 530 (per coin).

531 **Lemma A.10** (Lemma 4.8). *For biases  $\vec{a}, \vec{b} \in [0, 1]^d$  we have  $d_{\text{TV}}(\mathcal{D}_{A, \vec{a}, n}, \mathcal{D}_{A, \vec{b}, n}) \leq n \cdot d \cdot \|\vec{b} -$   
 532  $\vec{a}\|_\infty$ .*

533 *Proof.* We use the basic fact that an algorithm (deterministic or randomized) cannot increase the  
 534 total variation distance between two input distributions.

535 The distribution giving one sample flip of each coin in a collection with bias  $\vec{b}$  is the  $d$ -fold product  
 536 of Bernoulli distributions  $\prod_{i=1}^d \text{Bern}(b_i)$  (which for notational brevity we denote as  $\text{Bern}(\vec{b})$ , so the  
 537 distribution which gives  $n$  independent flips of each coin is the  $n$ -fold product of this and is denoted  
 538 as  $\text{Bern}(\vec{b})^{\otimes n}$ ). We will show that for two bias vectors  $\vec{a}$  and  $\vec{b}$ ,  $d_{\text{TV}}(\text{Bern}(\vec{b})^{\otimes n}, \text{Bern}(\vec{a})^{\otimes n}) \leq$   
 539  $n \cdot d \cdot \|\vec{b} - \vec{a}\|_\infty$ . This suffices to establish the lemma.

540 Observe that we have for each  $i \in [d]$ ,

$$d_{\text{TV}}(\text{Bern}(b_i), \text{Bern}(a_i)) = |b_i - a_i|.$$

541 Hence we have

$$d_{\text{TV}}(\text{Bern}(\vec{b}), \text{Bern}(\vec{a})) \leq \sum_{i=1}^d |b_i - a_i| \leq d \cdot \|\vec{b} - \vec{a}\|_\infty$$

542 and

$$d_{\text{TV}}(\text{Bern}(\vec{b})^{\otimes n}, \text{Bern}(\vec{a})^{\otimes n}) \leq n \cdot d \cdot \|\vec{b} - \vec{a}\|_\infty.$$

543

□

### 544 A.3 Missing Proofs From Section 5

#### 545 A.3.1 Proofs of Theorem 5.4, Theorem 5.5

546 **Theorem A.11** (Theorem 5.4). *Let  $\mathcal{H}$  be a concept class that is learnable with  $d$  non-adaptive*  
 547 *statistical queries, then  $\mathcal{H}$  is  $(d+1)$ -list reproducibly learnable. Furthermore, the sample complexity*  
 548  *$n = n(\nu, \delta)$  of the  $(d+1)$ -list replicable algorithm is  $O(\frac{d^2}{\nu^2} \cdot \log \frac{d}{\delta})$ , where  $\nu$  is the approximation*  
 549 *error parameter of each statistical query oracle.*

550 *Proof.* The proof is very similar to the proof of Theorem 4.4. Our replicable algorithm  $B$  works as  
 551 follows. Let  $\varepsilon$  and  $\delta$  be input parameters and  $\mathcal{D}$  be a distribution and  $f \in \mathcal{H}$ . Let  $A$  be the statistical  
 552 query learning algorithm for  $\mathcal{H}$ . Let  $STAT(D_f, \nu)$  be the statistical query oracle for this algorithm.  
 553 Let  $\phi_1, \dots, \phi_d$  be the statistical queries made by  $A$ .

554 Let  $\vec{b} = \langle b[1], b[2], \dots, b[d] \rangle$  where  $b[i] = E_{\langle x, y \rangle \in \mathcal{D}_f}[\phi_i(\langle x, y \rangle)]$ ,  $1 \leq i \leq d$ . Set  $\varepsilon_0 = \frac{\nu}{2d}$ . The  
 555 algorithm  $B$  first estimates the values  $b[i]$  up to an approximation error of  $\varepsilon_0$  with success probably  
 556  $1 - \delta/d$  for each query. Note that this can be done by a simple empirical estimation algorithm, that  
 557 uses a total of  $n = O(\frac{d^2}{\nu^2} \cdot \log \frac{d}{\delta})$  samples. Let  $\vec{v}$  be the estimated vector. It follows that  $\vec{v} \in \overline{B}_{\varepsilon_0}^\infty(\vec{b})$   
 558 with probability at least  $1 - \delta$ . Note that different runs of the algorithm will output different  $\vec{v}$ .

559 Next, the algorithm  $B$  evaluates the deterministic function  $f_\varepsilon$  from Lemma 3.1 on input  $\vec{v}$ . Let  $\vec{u}$  be  
 560 the output vector. Finally, the algorithm  $B$  simulates the statistical query algorithm  $A$  with  $\vec{u}[i]$  as  
 561 the answer to the query  $\phi_i$ . By Lemma 3.1,  $\vec{u} \in \overline{B}_\nu^\infty(\vec{b})$ . Thus the error of the hypothesis output by  
 562 the algorithm is at most  $\varepsilon$ . Since  $A$  is a deterministic algorithm the number of possible outputs only  
 563 depends on the number of outputs of the function  $f_\varepsilon$ , more precisely the number of possible outputs  
 564 is the size of the set  $\{f_\varepsilon(\vec{v}) : \vec{v} \in \overline{B}_{\varepsilon_0}^\infty(\vec{b})\}$  which is almost  $d+1$ , by Lemma 3.1. Thus the total  
 565 number of possible outputs of the algorithm  $B$  is at most  $d+1$  with probability at least  $1 - \delta$ . □

566 **Theorem A.12** (Theorem 5.5). *Let  $\mathcal{H}$  be a concept class that is learnable with  $d$  non-adaptive*  
 567 *statistical queries, then  $\mathcal{H}$  is  $\lceil \log \frac{d}{\delta} \rceil$ -certificate reproducibly learnable. Furthermore, the sample*  
 568 *complexity  $n = n(\nu, \delta)$  of this algorithm equals  $O(\frac{d^2}{\nu^2 \delta^2} \cdot \log \frac{d}{\delta})$ , where  $\nu$  is the approximation*  
 569 *error parameter of each statistical query oracle.*

570 *Proof.* The proof is very similar to the proof of Theorem 4.6. Our replicable algorithm  $B$  works as  
 571 follows, let  $\varepsilon$  and  $\delta$  be input parameters and  $\mathcal{D}$  be a distribution and  $f \in \mathcal{H}$ . Let  $A$  be the statistical  
 572 query learning algorithm for  $\mathcal{H}$  that outputs a hypothesis  $h$  with approximation error  $e_{\mathcal{D}_f}(h) = \varepsilon$ .  
 573 Let  $STAT(D_f, \nu)$  be the statistical query oracle for this algorithm. Let  $\phi_1, \dots, \phi_d$  be the statistical  
 574 queries made by  $A$ .

575 Let  $\vec{b} = \langle b[1], b[2], \dots, b[d] \rangle$ , where  $b[i] = E_{\langle x, y \rangle \in \mathcal{D}_f}[\phi_i(\langle x, y \rangle)]$ . Set  $\varepsilon_0 = \frac{\nu \delta}{2d}$ . The algorithm  $B$   
 576 first estimates the values  $b[i]$ ,  $1 \leq i \leq d$  up to an additive approximation error of  $\varepsilon_0$  with success  
 577 probably  $1 - \delta/d$  for each query. Note that this can be done by a simple empirical estimation algorithm  
 578 that uses a total of  $n = O(\frac{d^2}{\nu^2 \delta^2} \cdot \log \frac{d}{\delta})$  samples. Let  $\vec{v}$  be the estimated the vector. It follows that  
 579  $\vec{v} \in \overline{B}_{\varepsilon_0}^\infty(\vec{b})$  with probability at least  $1 - \delta$ . Next, the algorithm  $B$  evaluates the deterministic function  
 580  $f$  described in Lemma 3.2 with inputs  $r \in \{0, 1\}^\ell$  where  $\ell = \lceil \log \frac{d}{\delta} \rceil$  and  $\vec{v}$ . By Lemma 3.2 for at

581 least  $1 - \delta$  fraction of the  $r$ 's, the function  $f$  outputs a canonical  $v^* \in \overline{B}_\nu^\infty(\vec{b})$ . Finally, the algorithm  
582  $B$  simulates the statistical query algorithm  $A$  with  $v^*[i]$  as the answer to the query  $\phi_i$ . Since  $A$   
583 is a deterministic algorithm it follows that our algorithm  $B$  is certificate replicable. Note that the  
584 certificate complexity is  $\ell = \lceil \log \frac{d}{\delta} \rceil$ .  $\square$

585 The following theorem states how to convert adaptive statistical query learning algorithms into  
586 certificate reproducible PAC learning algorithms. This result also appears in the work of (GKM21;  
587 ILPS22), though they did not state the certificate complexity. We explicitly state the result here.

588 **Theorem A.13.** ((GKM21; ILPS22))[Theorem 5.6] *Let  $\mathcal{H}$  be a concept class that is learnable with  
589  $d$  adaptive statistical queries, then  $\mathcal{H}$  is  $\lceil d \log \frac{d}{\delta} \rceil$ -certificate reproducibly learnable. Furthermore,  
590 the sample complexity of this algorithm equals  $O(\frac{d^3}{\nu^2 \delta^2} \cdot \log \frac{d}{\delta})$ , where  $\nu$  is the approximation error  
591 parameter of each statistical query oracle.*

592 *Proof.* The proof uses similar arguments as before. The main difference is that we will evaluate each  
593 query with an approximation error of  $\frac{\nu \delta}{d}$  with a probability error of  $d/\delta$ . This requires  $O(\frac{d^2}{\nu^2 \delta^2} \cdot \log \frac{d}{\delta})$   
594 per query. We use a fresh set of certificate randomness for each such evaluation. Note that the length  
595 of the certificate for each query is  $\lceil \log d/\delta \rceil$ . Thus the total certificate complexity is  $\lceil d \log \frac{d}{\delta} \rceil$ .  $\square$

### 596 A.3.2 Proof of Theorem 5.9

597 We first recall the definition of the concept class  $d$ -THRESHOLD.

598 Fix some  $d \in \mathbb{N}$ . Let  $X = [0, 1]^d$ . For each value  $\vec{t} \in [0, 1]^d$ , let  $h_{\vec{t}} : X \rightarrow \{0, 1\}$  be the concept  
599 defined as follows:  $h_{\vec{t}}(\vec{x}) = 1$  if for every  $i \in [d]$  it holds that  $x_i \leq t_i$  and 0 otherwise. Let  $\mathcal{H}$  be the  
600 hypothesis class consisting of all such threshold concepts:  $\mathcal{H} = \{h_{\vec{t}} \mid \vec{t} \in [0, 1]^d\}$ .

601 **Theorem A.14** (Theorem 5.9). *In the PAC model under the uniform distribution, there is a  $d + 1$ -list  
602 replicable algorithm for the  $d$ -THRESHOLD. Moreover, for any  $k < d + 1$ , there does not exist a  
603  $k$ -list replicable algorithm for the concept class  $d$ -THRESHOLD under the uniform distribution. Thus  
604 its list complexity is exactly  $d + 1$ .*

605 It is easy to see that  $d$ -THRESHOLD is learnable under the uniform distribution by making  $d$  non-  
606 adaptive statistical queries. Thus by Theorem 5.4  $d$ -THRESHOLD under the uniform distribution  
607 admits a  $(d + 1)$ -list replicable algorithm. So we will focus on proving the lower bound which is  
608 stated as a separate theorem below.

609 **Theorem A.15.** *For  $k < d + 1$ , there does not exist a  $k$ -list replicable algorithm for the  $d$ -THRESHOLD  
610 in the PAC model under uniform distribution.*

611 The proof is similar to the proof of Theorem 4.7. The reason is that sampling  $d$ -many biased coins  
612 with bias vector  $\vec{b}$  is similar to obtaining a point  $\vec{x}$  uniformly at random from  $[0, 1]^d$  and evaluating the  
613 threshold function  $h_{\vec{b}}$  on it—this corresponds to asking whether all of the coins were heads/1's. The  
614 two models differ though, because in the sample model for the  $d$ -COIN BIAS ESTIMATION PROBLEM,  
615 the algorithm sees for each coin whether it is heads or tails, but this information is not available in  
616 the PAC model for the  $d$ -THRESHOLD. Conversely, in the PAC model for the  $d$ -THRESHOLD, a  
617 random draw from  $[0, 1]^d$  is available to the algorithm, but in the sample model for the  $d$ -COIN BIAS  
618 ESTIMATION PROBLEM the algorithm does not get this information.

619 Furthermore, there is the following additional complexity in the impossibility result for the  $d$ -  
620 THRESHOLD. In the  $d$ -COIN BIAS ESTIMATION PROBLEM, we said by definition that a collection of  
621  $d$  coins parameterized by bias vector  $\vec{a}$  was an  $\varepsilon$ -approximation to a collection of  $d$  coins parameterized  
622 by bias vector  $\vec{b}$  if and only if  $\|\vec{b} - \vec{a}\|_\infty \leq \varepsilon$ , and we used this norm in the proofs. However, the notion  
623 of  $\varepsilon$ -approximation in the PAC model is quite different than this. It is possible to have a hypotheses  
624  $h_{\vec{a}}$  and  $h_{\vec{b}}$  in the  $d$ -THRESHOLD such that  $\|\vec{b} - \vec{a}\|_\infty > \varepsilon$  but with respect to some distribution  $\mathcal{D}_X$   
625 on the domain  $X$  we have  $e_{\mathcal{D}_X}(h_{\vec{a}}, h_{\vec{b}}) \leq \varepsilon$ . For example, if  $\mathcal{D}_X$  is the uniform distribution on  
626  $X = [0, 1]^d$  and  $\vec{a} = \vec{0}$  and  $\vec{b}$  is the first standard basis vector  $\vec{b} = \langle 1, 0, \dots, 0 \rangle$ , and  $\varepsilon = \frac{1}{2}$ , then  
627  $\|\vec{b} - \vec{a}\|_\infty = 1 > \varepsilon$ , but  $e_{\mathcal{D}_X}(h_{\vec{a}}, h_{\vec{b}}) = 0 \leq \varepsilon$  because  $h_{\vec{a}}(\vec{x}) \neq h_{\vec{b}}(\vec{x})$  if and only if all of the last  
628  $d - 1$  coordinates of  $\vec{x}$  are 0 and the first coordinate is  $> 0$ , but there is probability 0 of sampling  
629 such  $\vec{x}$  from the uniform distribution on  $X = [0, 1]^d$ .



630 For this reason, we can't just partition  $[0, 1]^d$  as we did with the proof of [Theorem 4.7](#) and must  
 631 do something more clever. It turns out that it is possible to find a subset  $[\alpha, 1]^d$  on which hypothe-  
 632 ses parameterized by vectors on opposite faces of this cube  $[\alpha, 1]^d$  have high PAC error between  
 633 them. A consequence by the triangle inequality of  $e_{\mathcal{D}_X}$  is that two such hypotheses cannot both be  
 634 approximated by a common third hypothesis. This is the following lemma states.

635 **Lemma A.16.** *Let  $d \in \mathbb{N}$  and  $\alpha = \frac{d-1}{d}$ . Let  $\vec{s}, \vec{t} \in [\alpha, 1]^d$  such that there exists a coordinate  $i_0 \in [d]$   
 636 where  $s_{i_0} = \alpha$  and  $t_{i_0} = 1$  (i.e.  $\vec{s}$  and  $\vec{t}$  are on opposite faces of this cube). Let  $\varepsilon \leq \frac{1}{8d}$ . Then there is  
 637 no point  $\vec{r} \in X$  such that both  $e_{\text{unif}}(h_{\vec{s}}, h_{\vec{r}}) \leq \varepsilon$  and  $e_{\text{unif}}(h_{\vec{t}}, h_{\vec{r}}) \leq \varepsilon$  (i.e. there is no hypothesis  
 638 which is an  $\varepsilon$ -approximation to both  $h_{\vec{s}}$  and  $h_{\vec{t}}$ ).*

639 *Proof.* Let  $\vec{q} = \left\langle \begin{cases} s_i & i = i_0 \\ t_i & i \neq i_0 \end{cases} \right\rangle_{i=1}^d$  which will serve as a proxy to  $\vec{s}$ .

640 We need the following claim.

641 **Claim A.17.** *For each  $\vec{x} \in X$ , the following are equivalent:*

- 642 1.  $h_{\vec{q}}(\vec{x}) \neq h_{\vec{t}}(\vec{x})$
- 643 2.  $h_{\vec{q}}(\vec{x}) = 0$  and  $h_{\vec{t}}(\vec{x}) = 1$
- 644 3.  $x_{i_0} \in (q_{i_0}, t_{i_0}] = (\alpha, 1]$  and for all  $i \in [d] \setminus \{i_0\}$ ,  $x_i \in [0, t_i]$ .

645 *Furthermore, the above equivalent conditions imply the following:*

- 646 4.  $h_{\vec{s}}(\vec{x}) \neq h_{\vec{t}}(\vec{x})$ .

647 *Proof of Claim [A.17](#)*

648 [\(2\)](#)  $\implies$  [\(1\)](#): This is trivial.

649 [\(1\)](#)  $\implies$  [\(2\)](#): Note that because  $q_{i_0} = s_{i_0} = \alpha < 1 = t_{i_0}$ , we have for all  $i \in [d]$  that  $q_i \leq t_i$ . If  
 650  $h_{\vec{t}}(\vec{x}) = 0$  then for some  $i_1 \in [d]$  it must be that  $x_{i_1} > t_{i_1}$ , but since  $t_{i_1} \geq q_{i_1}$  it would also be the  
 651 case that  $x_{i_1} > q_{i_1}$ , so  $h_{\vec{q}}(\vec{x}) = 0$  which gives the contradiction that  $h_{\vec{q}}(\vec{x}) = h_{\vec{t}}(\vec{x})$ . Thus  $h_{\vec{t}}(\vec{x}) = 1$ ,  
 652 and since  $h_{\vec{q}}(\vec{x}) \neq h_{\vec{t}}(\vec{x})$  we have  $h_{\vec{q}}(\vec{x}) = 0$ .

653 [\(1\)](#)  $\iff$  [\(3\)](#): We partition  $[0, 1]^d$  into three sets and examine these three cases.

654 **Case 1:**  $x_{i_0} \in (q_{i_0}, t_{i_0}] = (\alpha, 1]$  and for all  $i \in [d] \setminus \{i_0\}$ ,  $x_i \in [0, t_i]$ . In this case,  $q_{i_0} < x_{i_0}$  so  
 655  $h_{\vec{q}}(\vec{x}) = 0$  and for all  $i \in [d]$   $x_i \leq t_i$ , so  $h_{\vec{t}}(\vec{x}) = 1$ , so  $h_{\vec{q}}(\vec{x}) \neq h_{\vec{t}}(\vec{x})$ .

656 **Case 2:**  $x_{i_0} \notin (q_{i_0}, t_{i_0}] = (\alpha, 1]$  and for all  $i \in [d] \setminus \{i_0\}$ ,  $x_i \in [0, t_i]$ . In this case, because  
 657  $x_{i_0} \in [0, 1]$  and  $x_{i_0} \notin (\alpha, 1]$  we have  $x_{i_0} \leq \alpha = q_{i_0} \leq t_{i_0}$  and also for all other  $i \in [d] \setminus \{i_0\}$ ,  
 658  $x_i \leq t_i = q_i$  (by definition of  $\vec{q}$ ). Thus  $h_{\vec{q}}(\vec{x}) = 1 = h_{\vec{t}}(\vec{x})$ .

659 **Case 3:** For some  $i_1 \in [d] \setminus \{i_0\}$ ,  $x_{i_1} \notin [0, t_{i_1}]$ . In this case, because  $x_{i_1} \in [0, 1]$ , we have  
 660  $x_{i_1} > t_{i_1} = q_{i_1}$ . Thus  $h_{\vec{q}}(\vec{x}) = 0 = h_{\vec{t}}(\vec{x})$ .

661 Thus, it is the case that  $h_{\vec{q}}(\vec{x}) \neq h_{\vec{t}}(\vec{x})$  if and only if  $x_{i_0} \in (q_{i_0}, t_{i_0}] = (\alpha, 1]$  and for all  $i \in [d] \setminus \{i_0\}$ ,  
 662  $x_i \in [0, t_i]$ .

663 [\(1, 2, 3\)](#)  $\implies$  [\(4\)](#): By [\(2\)](#), we have  $x_{i_0} > q_{i_0}$ , and since  $q_{i_0} = s_{i_0}$  by definition of  $\vec{q}$ , it follows that  
 664  $x_{i_0} > s_{i_0}$  which means  $h_{\vec{s}}(\vec{x}) = 0$ . By [\(3\)](#),  $h_{\vec{t}}(\vec{x}) = 1$  which gives  $h_{\vec{s}}(\vec{x}) \neq h_{\vec{t}}(\vec{x})$ .  $\square$

665 We also need the following Lemma.

666 **Lemma A.18.** *Let  $d \in \mathbb{N}$  and  $\alpha = \frac{d-1}{d} = 1 - \frac{1}{d}$ . Then  $(1 - \alpha) \cdot \alpha^{d-1} > \frac{1}{4d}$ .*

667 *Proof.* If  $d = 1$ , then  $\alpha = 0$  so  $(1 - \alpha) \cdot \alpha^{d-1} = 1 \geq \frac{1}{4} = \frac{1}{4d}$  (see footnote [2](#)).

<sup>2</sup>This uses the interpretation that  $0^0 = 1$  which is the correct interpretation in the context in which we will use the lemma.

668 If  $d \geq 2$ , then we utilize the fact that  $(1 - \frac{1}{d})^d \geq \frac{1}{4}$  in the following:

$$\begin{aligned}
(1 - \alpha) \cdot \alpha^{d-1} &= (\frac{1}{d})(1 - \frac{1}{d})^{d-1} \\
&= (\frac{1}{d}) \frac{(1 - \frac{1}{d})^d}{1 - \frac{1}{d}} \\
&= \frac{(1 - \frac{1}{d})^d}{d - 1} \\
&\geq \frac{1}{4(d - 1)} \\
&> \frac{1}{4d}.
\end{aligned}$$

669 This completes the proof. As an aside,  $\alpha = \frac{d-1}{d}$  is the value of  $\alpha$  that maximizes the expression  
670  $(1 - \alpha) \cdot \alpha^{d-1}$  which is why that value was chosen.  $\square$

671 With the above Claim and Lemma in hand, we return to the proof of Lemma [A.16](#). Our next step will  
672 be to prove the following two inequalities:

$$2\varepsilon < e_{\text{unif}}(h_{\vec{q}}, h_{\vec{t}}) \leq e_{\text{unif}}(h_{\vec{s}}, h_{\vec{t}}).$$

673 For the second of these inequalities, note that by the [\(1\)](#)  $\implies$  [\(4\)](#) part of claim above, since  $h_{\vec{q}}(\vec{x}) \neq$   
674  $h_{\vec{t}}(\vec{x})$  implies  $h_{\vec{s}}(\vec{x}) \neq h_{\vec{t}}(\vec{x})$  we have

$$\begin{aligned}
e_{\text{unif}}(h_{\vec{q}}, h_{\vec{t}}) &= \Pr_{\vec{x} \sim \text{unif}(X)} [h_{\vec{q}}(\vec{x}) \neq h_{\vec{t}}(\vec{x})] \\
&\leq \Pr_{\vec{x} \sim \text{unif}(X)} [h_{\vec{s}}(\vec{x}) \neq h_{\vec{t}}(\vec{x})] \\
&= e_{\text{unif}}(h_{\vec{s}}, h_{\vec{t}}).
\end{aligned}$$

675 Now, for the first of the inequalities above, we will use the [\(1\)](#)  $\iff$  [\(3\)](#) portion of the claim, we will  
676 use our hypothesis that  $\vec{t} \in [\alpha, 1]^d$  (which implies for each  $i \in [d]$  that  $[0, t_i] \subseteq [0, \alpha]$ ), we will use  
677 the hypothesis that  $\varepsilon \leq \frac{1}{8d}$ , and we will use [Theorem A.18](#). Utilizing these, we get the following:

$$\begin{aligned}
&e_{\text{unif}}(h_{\vec{q}}, h_{\vec{t}}) \\
&= \Pr_{\vec{x} \sim \text{unif}(X)} [h_{\vec{q}}(\vec{x}) \neq h_{\vec{t}}(\vec{x})] \\
&= \Pr_{\vec{x} \sim \text{unif}(X)} [x_{i_0} \in (\alpha, 1] \wedge \forall i \in [d] \setminus \{i_0\}, x_i \in [0, t_i]] \\
&= \Pr_{x_{i_0} \sim \text{unif}([0,1])} [x_{i_0} \in (\alpha, 1)] \cdot \prod_{\substack{i=1 \\ i \neq i_0}}^d \Pr_{x \sim \text{unif}([0,1])} [x \in [0, t_i]] \\
&\geq \Pr_{x_{i_0} \sim \text{unif}([0,1])} [x_{i_0} \in (\alpha, 1)] \cdot \prod_{\substack{i=1 \\ i \neq i_0}}^d \Pr_{x \sim \text{unif}([0,1])} [x \in [0, \alpha]] \\
&= (1 - \alpha) \cdot \alpha^{d-1} \\
&> \frac{1}{4d} \\
&\geq 2\varepsilon.
\end{aligned}$$

678 Thus, we get the desired two inequalities:

$$2\varepsilon < e_{\text{unif}}(h_{\vec{q}}, h_{\vec{t}}) \leq e_{\text{unif}}(h_{\vec{s}}, h_{\vec{t}}).$$

679 This nearly completes the proof. If there existed some point  $\vec{r} \in X$  such that both  $e_{\text{unif}}(h_{\vec{s}}, h_{\vec{r}}) \leq \varepsilon$   
680 and  $e_{\text{unif}}(h_{\vec{t}}, h_{\vec{r}}) \leq \varepsilon$ , then it would follow from the triangle inequality of  $e_{\text{unif}}$  that

$$e_{\text{unif}}(h_{\vec{s}}, h_{\vec{t}}) \leq e_{\text{unif}}(h_{\vec{s}}, h_{\vec{r}}) + e_{\text{unif}}(h_{\vec{t}}, h_{\vec{r}}) \leq 2\varepsilon$$

681 but this would contradict the above inequalities, so no such  $\vec{r}$  exists.  $\square$



682 Equipped with the Lemma [A.16](#), we are now ready to prove Theorem [A.15](#).

683 *Proof of Theorem [A.15](#).* Fix any  $d \in \mathbb{N}$ , and choose  $\varepsilon$  and  $\delta$  as  $\varepsilon \leq \frac{1}{4d}$  and  $\delta \leq \frac{1}{d+2}$ . We will use the  
 684 constant  $\alpha = \frac{d-1}{d}$  and consider the cube  $[\alpha, 1]^d$ .

685 Suppose for contradiction such an algorithm  $A$  does exist for some  $k < d + 1$ . This means that for  
 686 each possible threshold  $\vec{t} \in [0, 1]^d$ , there exists some set  $L_{\vec{t}} \subseteq \mathcal{H}$  of hypotheses with three properties:  
 687 (1) each element of  $L_{\vec{t}}$  is an  $\varepsilon$ -approximation to  $h_{\vec{t}}$ , (2)  $|L_{\vec{t}}| \leq k$ , and (3) with probability at least  
 688  $1 - \delta$ ,  $A$  returns an element of  $L_{\vec{t}}$ .

689 By the trivial averaging argument, this means that there exists at least one element in  $L_{\vec{t}}$  which is  
 690 returned by  $A$  with probability at least  $\frac{1}{k} \cdot (1 - \delta) \geq \frac{1}{k} \cdot (1 - \frac{1}{d+2}) = \frac{1}{k} \cdot \frac{d+1}{d+2} \geq \frac{1}{k} \cdot \frac{k+1}{k+2}$ . Let  
 691  $f: [\alpha, 1]^d \rightarrow [0, 1]^d$  be a function which maps each threshold  $\vec{t} \in [\alpha, 1]^d$  to such an element (the  
 692 maximum probability element with ties broken arbitrarily) of  $L_{\vec{t}}$ . This is slightly different from the  
 693 proof of [Theorem 4.7](#) because we are defining the function  $f$  on only a very specific subset of the  
 694 possible thresholds. The reason for this was alluded to in the discussion following the statement of  
 695 [Theorem A.15](#).

696 The function  $f$  induces a partition  $\mathcal{P}$  of  $[\alpha, 1]^d$  where the members of  $\mathcal{P}$  are the fibers of  $f$  (i.e.  
 697  $\mathcal{P} = \{f^{-1}(\vec{y}) : \vec{y} \in \text{range}(f)\}$ ). For any member  $W \in \mathcal{P}$  and any coordinate  $i \in [d]$ , it cannot  
 698 be that the set  $w_i : \vec{w} \in W$  contains both values  $\alpha$  and  $1$ —if it did, then there would be two points  
 699  $\vec{s}, \vec{t} \in W$  such that  $s_i = \alpha$  and  $t_i = 1$ , but because they both belong to  $W$ , there is some  $\vec{y} \in [0, 1]^d$   
 700 such that  $f(\vec{s}) = \vec{y} = f(\vec{t})$ , but by definition of the partition,  $h_{\vec{y}}$  would have to be an  $\varepsilon$ -approximation  
 701 (in the PAC model) of both  $h_{\vec{s}}$  and  $h_{\vec{t}}$ , but by Lemma [A.16](#) this is not possible.

702 Thus, the partition  $\mathcal{P}$  is a *non-spanning* partition of  $[\alpha, 1]^d$  as in the proof of Lemma [3.3](#), so there is  
 703 some point  $\vec{p} \in [\alpha, 1]^d$  such that for every radius  $r > 0$ , it holds that  $\overline{B}_r^\infty(\vec{p})$  intersects at least  $d + 1$   
 704 members of  $\mathcal{P}$ . In fact, there is some radius  $r$  such that  $\|\vec{t} - \vec{s}\|_\infty \leq r$ , then  $d_{\text{TV}}(\mathcal{D}_{A, \vec{s}, n}, \mathcal{D}_{A, \vec{t}, n}) \leq \eta$ ,  
 705 for  $\eta$  the lies between 0 and  $\frac{1}{k} \cdot \frac{k+1}{k+2} - \frac{1}{k+1}$ .

706 Now we get the same type of contradiction as in the proof of [Theorem 4.7](#): for the special point  $\vec{p}$  we  
 707 have that  $\mathcal{D}_{A, \vec{p}, n}$  is a distribution that has  $d + 1 \geq k + 1$  disjoint events that each have probability  
 708 greater than  $\frac{1}{k+1}$ . Thus, no  $k$ -list replicable algorithm exists.  $\square$

## 709 B Supplementary Material: Prior and Related Work

710 We give a more detailed discussion on prior and related work. This section is an elaboration of the  
 711 Section [2](#) from the main body of the paper. Since this expanded section cites more work from the  
 712 literature, we include a new bibliography.

713 Formalizing reproducibility and replicability has gained considerable momentum in recent years.  
 714 While the terms reproducibility and replicability are very close and often used interchangeably, there  
 715 has been an effort to distinguish between them and accordingly, our notions fall in the replicability  
 716 definition ([PVL<sup>+</sup>21](#)).

717 In the context of randomized algorithms, various notions of reproducibility/replicability have been  
 718 investigated. The work of Gat and Goldwasser ([GG11](#)) formalized and defined the notion of *pseudo-*  
 719 *deterministic algorithms*. A randomized algorithm  $A$  is *pseudodeterministic* if, for any input  
 720  $x$ , there is a canonical value  $v_x$  such that  $\Pr[A(x) = v_x] \geq 2/3$ . Gat and Goldwasser designed  
 721 polynomial-time pseudodeterministic algorithms for algebraic computational problems, such as  
 722 finding quadratic non-residues and finding non-roots of multivariate polynomials ([GG11](#)). Later  
 723 works studied the notion of pseudodeterminism in other algorithmic settings, such as parallel com-  
 724 putation, streaming and sub-linear algorithms, interactive proofs, and its connections to complexity  
 725 theory ([GG](#); [GGH18](#); [OS17](#); [OS18](#); [AV20](#); [GGMW20](#); [LOS21](#); [DPVWV22](#)).

726 In the algorithmic setting, mainly two generalizations of pseudodeterminism have been investigated:  
 727 *multi-pseudodeterministic algorithms* ([Gol19](#)) and *influential bit algorithms* ([GL19](#)). A randomized  
 728 algorithm  $A$  is  $k$ -pseudodeterministic if, for every input  $x$ , there is a set  $S_x$  of size at most  $k$   
 729 such that the output of  $A(x)$  belongs to the set  $S_x$  with high probability. When  $k = 1$ , we get  
 730 pseudodeterminism. A randomized algorithm  $A$  is  $\ell$ -influential-bit algorithm if, for every input  $x$ ,

731 for most of the strings  $r$  of length  $\ell$ , there exists a canonical value  $v_{x,r}$  such that the algorithm  $A$   
732 on inputs  $x$  and  $r$  outputs  $v_{x,r}$  with high probability. The string  $r$  is called the *influential bit* string.  
733 Again, when  $\ell = 0$ , we get back pseudodeterminism. The main focus of these works has been to  
734 investigate reproducibility in randomized search algorithms.

735 Very recently, pseudodeterminism and its generalizations have been explored in the context of learning  
736 algorithms to formalize the notion of replicability. The seminal work of (BLM20) defined the notion  
737 of *global stability*. They define a learning algorithm  $A$  to be  $(n, \eta)$ -globally stable with respect to  
738 a distribution  $D$  if there is a hypothesis  $h$  such that  $\Pr_{S \sim D^n}(A(S) = h) \geq \eta$ , here  $\eta$  is called the  
739 *stability parameter*. Note that the notion of global stability is equivalent to Gat and Goldwasser’s  
740 notion of pseudodeterminism when  $\eta = 2/3$ . Since Gat and Goldwasser’s motivation is to study  
741 pseudodeterminism in the context of randomized algorithms, the success probability is taken as  $2/3$ .  
742 In the context of learning, studying the stability parameter  $\eta$  turned out to be useful. The work of  
743 Bun, Livny and Moran (BLM20) showed that any concept class with Littlestone dimension  $d$  has  
744 an  $(m, \eta)$ -globally stable learning algorithm with  $m = \tilde{O}(2^{2^d}/\alpha)$  and  $\eta = \tilde{O}(2^{-2^d})$ , where the  
745 error of  $h$  (with respect to the unknown hypothesis) is  $\leq \alpha$ . Then they established that a globally  
746 stable learner implies a differentially private learner. This, together with an earlier work of Alon,  
747 Livny, Malliaris, and Moran (ALMM19), establishes an equivalence between online learnability and  
748 differentially private PAC learnability.

749 The work of Ghazi, Kumar, and Manurangsi (GKM21) extended the notion of global stability to  
750 pseudo-global stability and list-global stability. The notion of pseudo-global stability is very similar  
751 to the earlier-mentioned notion of influential bit algorithms of Grossman and Liu (GL19) when  
752 translated to the context of learning. Similarly, the list-global stability is similar to Goldreich’s  
753 notion of multi-pseudodeterminism (Gol19). These notions coincide with our definitions of list  
754 replicability and certificate replicability respectively. The work of (GKM21) used these concepts to  
755 design user-level differentially private algorithms.

756 The recent work reported in (ILPS22) introduced the notion of  $\rho$ -replicability. A learning algorithm  $A$   
757 is  $\rho$ -replicable if  $\Pr_{S_1, S_2, r}[A(S_1, r) = A(S_2, r)] \geq 1 - \rho$ , where  $S_1$  and  $S_2$  are samples drawn from a  
758 distribution  $\mathcal{D}$  and  $r$  is the internal randomness of the learning algorithm  $A$ . They designed replicable  
759 algorithms for many learning tasks, including statistical queries, approximate heavy hitters, median,  
760 and learning half-spaces. It is known that the notions of pseudo-global stability and  $\rho$ -replicability  
761 are the same up to polynomial factors in the parameters (ILPS22; GKM21).

762 In this work, we study the notions of list and certificate complexities as a measure the *degree of (non)*  
763 *replicability*. Our goal is to design learning algorithms with optimal list and certificate complexities  
764 while minimizing the sample complexity. The earlier works (BLM20; GKM21; ILPS22) did not  
765 focus on minimizing these quantities. The works of (BLM20; GKM21) used replicable algorithms as  
766 an intermediate step to design differentially private algorithms. The work of (ILPS22) did not consider  
767 reducing the certificate complexity in their algorithms and also did not study list-replicability. Earlier  
768 works (GKM21; ILPS22) studied how to convert statistical query learning algorithms into certificate  
769 replicable learning algorithms, however, their focus was not on the certificate complexity. Here, we  
770 study the relationship among (nonadaptive and adaptive) statistical query learning algorithms, list  
771 replicable algorithms, and certificate replicable algorithms with a focus on list, certificate and sample  
772 complexities.

773 A very recent and independent work of (CMY23) investigated relations between list replicability  
774 and the stability parameter  $\nu$ , in the context of distribution-free PAC learning. They showed that for  
775 every concept class  $\mathcal{H}$ , its list complexity is exactly the inverse of the stability parameter. They also  
776 showed that the list complexity of a hypothesis class is at least its VC dimension. For establishing  
777 this they exhibited, for any  $d$ , a concept class whose list complexity is exactly  $d$ . There are some  
778 similarities between their work and the present work. We establish similar upper and lower bounds on  
779 the list complexity but for different learning tasks:  $d$ -THRESHOLD and  $d$ -COIN BIAS ESTIMATION  
780 PROBLEM. For  $d$ -THRESHOLD, our results are for PAC learning under *uniform* distribution and do  
781 not follow from their distribution-independent results. Thus our results, though similar in spirit, are  
782 incomparable to theirs. Moreover, their work did not focus on efficiency in sample complexity and  
783 also did not study certificate complexity which is a focus of our paper. We do not study the stability  
784 parameter.

785 The study of notions of reproducibility/replicability in various computational fields is an emerging  
786 topic. The article (PVLS<sup>+</sup>21) discusses the differences between replicability and reproducibility. In

787 (EKK<sup>+</sup>23), the authors consider replicability in the context of stochastic bandits. Their notion is  
788 similar to the notion studied in (LPS22). In (AJJ<sup>+</sup>22), the authors investigate *reproducibility* in the  
789 context of optimization with *inexact oracles* (initialization/gradient oracles). The setup and focus of  
790 these works are different from ours.

## References

- 791
- 792 [AJJ<sup>+</sup>22] Kwangjun Ahn, Prateek Jain, Ziwei Ji, Satyen Kale, Praneeth Netrapalli, and Gil I.  
793 Shamir. Reproducibility in optimization: Theoretical framework and limits, 2022.  
794 [arXiv:2202.04598](https://arxiv.org/abs/2202.04598).
- 795 [ALMM19] Noga Alon, Roi Livni, Maryanthe Malliaris, and Shay Moran. Private PAC learning  
796 implies finite littlestone dimension. In Moses Charikar and Edith Cohen, editors,  
797 *Proceedings of the 51st Annual ACM SIGACT Symposium on Theory of Computing,*  
798 *STOC 2019, Phoenix, AZ, USA, June 23-26, 2019*, pages 852–860. ACM, 2019.
- 799 [AV20] Nima Anari and Vijay V. Vazirani. Matching is as easy as the decision problem, in  
800 the NC model. In Thomas Vidick, editor, *11th Innovations in Theoretical Computer*  
801 *Science Conference, ITCS 2020, January 12-14, 2020, Seattle, Washington, USA*,  
802 volume 151 of *LIPICs*, pages 54:1–54:25. Schloss Dagstuhl - Leibniz-Zentrum für  
803 Informatik, 2020.
- 804 [Bak16] Monya Baker. 1,500 scientists lift the lid on reproducibility. *Nature*, 533:452–454,  
805 2016.
- 806 [BLM20] Mark Bun, Roi Livni, and Shay Moran. An equivalence between private classification  
807 and online prediction. In Sandy Irani, editor, *61st IEEE Annual Symposium on*  
808 *Foundations of Computer Science, FOCS 2020, Durham, NC, USA, November 16-19,*  
809 *2020*, pages 389–402. IEEE, 2020.
- 810 [CMY23] Zachary Chase, Shay Moran, and Amir Yehudayoff. Replicability and stability in  
811 learning, 2023. [arXiv:2304.03757](https://arxiv.org/abs/2304.03757).
- 812 [DLPES02] Jesus A. De Loera, Elisha Peterson, and Francis Edward Su. A Polytopal General-  
813 ization of Sperner’s Lemma. *Journal of Combinatorial Theory, Series A*, 100(1):1–  
814 26, October 2002. URL: [https://www.sciencedirect.com/science/](https://www.sciencedirect.com/science/article/pii/S0097316502932747)  
815 [article/pii/S0097316502932747](https://www.sciencedirect.com/science/article/pii/S0097316502932747), doi:10.1006/jcta.2002.3274.
- 816 [DPV18] Peter Dixon, Aduri Pavan, and N. V. Vinodchandran. On pseudodeterministic approxi-  
817 mation algorithms. In Igor Potapov, Paul G. Spirakis, and James Worrell, editors, *43rd*  
818 *International Symposium on Mathematical Foundations of Computer Science, MFCS*  
819 *2018, August 27-31, 2018, Liverpool, UK*, volume 117 of *LIPICs*, pages 61:1–61:11.  
820 Schloss Dagstuhl - Leibniz-Zentrum für Informatik, 2018.
- 821 [DPVWV22] Peter Dixon, Aduri Pavan, Jason Vander Woude, and N. V. Vinodchandran. Pseudo-  
822 determinism: promises and lowerbounds. In Stefano Leonardi and Anupam Gupta,  
823 editors, *STOC ’22: 54th Annual ACM SIGACT Symposium on Theory of Computing,*  
824 *Rome, Italy, June 20 - 24, 2022*, pages 1552–1565. ACM, 2022.
- 825 [eco13] How science goes wrong. *The Economist*, pages 25–30, 2013.
- 826 [EKK<sup>+</sup>23] Hossein Esfandiari, Alkis Kalavasis, Amin Karbasi, Andreas Krause, Vahab Mirrokni,  
827 and Grigoris Velezgas. Replicable bandits, 2023. [arXiv:2210.01898](https://arxiv.org/abs/2210.01898).
- 828 [GG] Shafi Goldwasser and Ofer Grossman. Bipartite perfect matching in pseudo-  
829 deterministic NC. In Ioannis Chatzigiannakis, Piotr Indyk, Fabian Kuhn, and Anca  
830 Muscholl, editors, *44th International Colloquium on Automata, Languages, and Pro-*  
831 *gramming, ICALP 2017, July 10-14, 2017, Warsaw, Poland*, volume 80 of *LIPICs*.
- 832 [GG11] Eran Gat and Shafi Goldwasser. Probabilistic Search Algorithms with Unique Answers  
833 and Their Cryptographic Applications. Technical Report 136, 2011. URL: [https://ecc.](https://ecc.weizmann.ac.il/report/2011/136/)  
834 [weizmann.ac.il/report/2011/136/](https://ecc.weizmann.ac.il/report/2011/136/).
- 835 [GGH18] Shafi Goldwasser, Ofer Grossman, and Dhiraj Holden. Pseudo-deterministic proofs. In  
836 Anna R. Karlin, editor, *9th Innovations in Theoretical Computer Science Conference,*  
837 *ITCS 2018, January 11-14, 2018, Cambridge, MA, USA*, volume 94 of *LIPICs*, pages  
838 17:1–17:18. Schloss Dagstuhl - Leibniz-Zentrum für Informatik, 2018.

- 839 [GGMW20] Shafi Goldwasser, Ofer Grossman, Sidhanth Mohanty, and David P. Woodruff. Pseudo-  
840 deterministic streaming. In Thomas Vidick, editor, *11th Innovations in Theoretical*  
841 *Computer Science Conference, ITCS*, volume 151 of *LIPICs*, pages 79:1–79:25, 2020.
- 842 [GKM21] Badih Ghazi, Ravi Kumar, and Pasin Manurangsi. User-level differentially private  
843 learning via correlated sampling. In Marc’Aurelio Ranzato, Alina Beygelzimer,  
844 Yann N. Dauphin, Percy Liang, and Jennifer Wortman Vaughan, editors, *Advances in*  
845 *Neural Information Processing Systems 34: Annual Conference on Neural Information*  
846 *Processing Systems 2021, NeurIPS 2021, December 6-14, 2021, virtual*, pages 20172–  
847 20184, 2021.
- 848 [GL19] Ofer Grossman and Yang P. Liu. Reproducibility and pseudo-determinism in log-  
849 space. In Timothy M. Chan, editor, *Proceedings of the Thirtieth Annual ACM-SIAM*  
850 *Symposium on Discrete Algorithms, SODA 2019, San Diego, California, USA, January*  
851 *6-9, 2019*, pages 606–620. SIAM, 2019. [doi:10.1137/1.9781611975482.](https://doi.org/10.1137/1.9781611975482.38)  
852 [38](https://doi.org/10.1137/1.9781611975482.38).
- 853 [Gol19] Oded Goldreich. Multi-pseudodeterministic algorithms. *Electron. Colloquium Com-*  
854 *put. Complex.*, TR19-012, 2019. URL: [https://eccc.weizmann.ac.il/](https://eccc.weizmann.ac.il/report/2019/012)  
855 [report/2019/012](https://eccc.weizmann.ac.il/report/2019/012), [arXiv:TR19-012](https://arxiv.org/abs/1901.09517).
- 856 [ILPS22] Russell Impagliazzo, Rex Lei, Toniann Pitassi, and Jessica Sorrell. Reproducibility in  
857 learning. In Stefano Leonardi and Anupam Gupta, editors, *STOC ’22: 54th Annual*  
858 *ACM SIGACT Symposium on Theory of Computing, Rome, Italy, June 20 - 24, 2022*,  
859 pages 818–831. ACM, 2022. [doi:10.1145/3519935.3519973](https://doi.org/10.1145/3519935.3519973).
- 860 [JP05] Ioannidis JP. Why most published research findings are false. *PLOS Medicine*, 2(8),  
861 2005.
- 862 [Kea98] Michael J. Kearns. Efficient noise-tolerant learning from statistical queries. *J. ACM*,  
863 45(6):983–1006, 1998.
- 864 [LOS21] Zhenjian Lu, Igor Carboni Oliveira, and Rahul Santhanam. Pseudodeterministic  
865 algorithms and the structure of probabilistic time. In Samir Khuller and Virginia Vas-  
866 silevska Williams, editors, *STOC ’21: 53rd Annual ACM SIGACT Symposium on*  
867 *Theory of Computing, Virtual Event, Italy, June 21-25, 2021*, pages 303–316. ACM,  
868 2021.
- 869 [MPK19] Harshal Mittal, Kartikey Pandey, and Yash Kant. Iclr reproducibility challenge report  
870 (padam : Closing the generalization gap of adaptive gradient methods in training deep  
871 neural networks), 2019. [arXiv:1901.09517](https://arxiv.org/abs/1901.09517).
- 872 [NAS19] Reproducibility and Replicability in Science. [https://doi.org/10.17226/](https://doi.org/10.17226/25303)  
873 [25303](https://doi.org/10.17226/25303), 2019. National Academies of Sciences, Engineering, and Medicine.
- 874 [OS17] I. Oliveira and R. Santhanam. Pseudodeterministic constructions in subexponential  
875 time. In *Proceedings of the 49th Annual ACM SIGACT Symposium on Theory of*  
876 *Computing, STOC 2017, Montreal, QC, Canada, June 19-23, 2017*, pages 665–677,  
877 2017.
- 878 [OS18] Igor Carboni Oliveira and Rahul Santhanam. Pseudo-derandomizing learning and  
879 approximation. In *Approximation, Randomization, and Combinatorial Optimization.*  
880 *Algorithms and Techniques, APPROX/RANDOM 2018*, volume 116 of *LIPICs*, pages  
881 55:1–55:19, 2018.
- 882 [PVLS<sup>+</sup>21] Joelle Pineau, Philippe Vincent-Lamarre, Koustuv Sinha, Vincent Larivière, Alina  
883 Beygelzimer, Florence d’Alche Buc, Emily Fox, and Hugo Larochelle. Improving  
884 reproducibility in machine learning research(a report from the neurips 2019 repro-  
885 ducibility program). *Journal of Machine Learning Research*, 22(164):1–20, 2021.  
886 URL: <http://jmlr.org/papers/v22/20-303.html>.

- 887 [SZ99] Michael E. Saks and Shiyu Zhou.  $BP_h\text{SPACE}(S) \subseteq \text{DSPACE}(S^{3/2})$ . *J. Comput. Syst.*  
888 *Sci.*, 58(2):376–403, 1999.
- 889 [VWDP<sup>+</sup>22] Jason Vander Woude, Peter Dixon, Aduri Pavan, Jamie Radcliffe, and N. V. Vinodchan-  
890 dran. Geometry of rounding. *CoRR*, abs/2211.02694, 2022. [arXiv:2211.02694](https://arxiv.org/abs/2211.02694),  
891 [doi:10.48550/arXiv.2211.02694](https://doi.org/10.48550/arXiv.2211.02694).
